# Supplementary material
Source: publisher site journal article supplement (https://www.dovepress.com/article/491749)

Fig S1. The relative mRNA expression of KLF12 in different experimental groups. ***P<0.001.


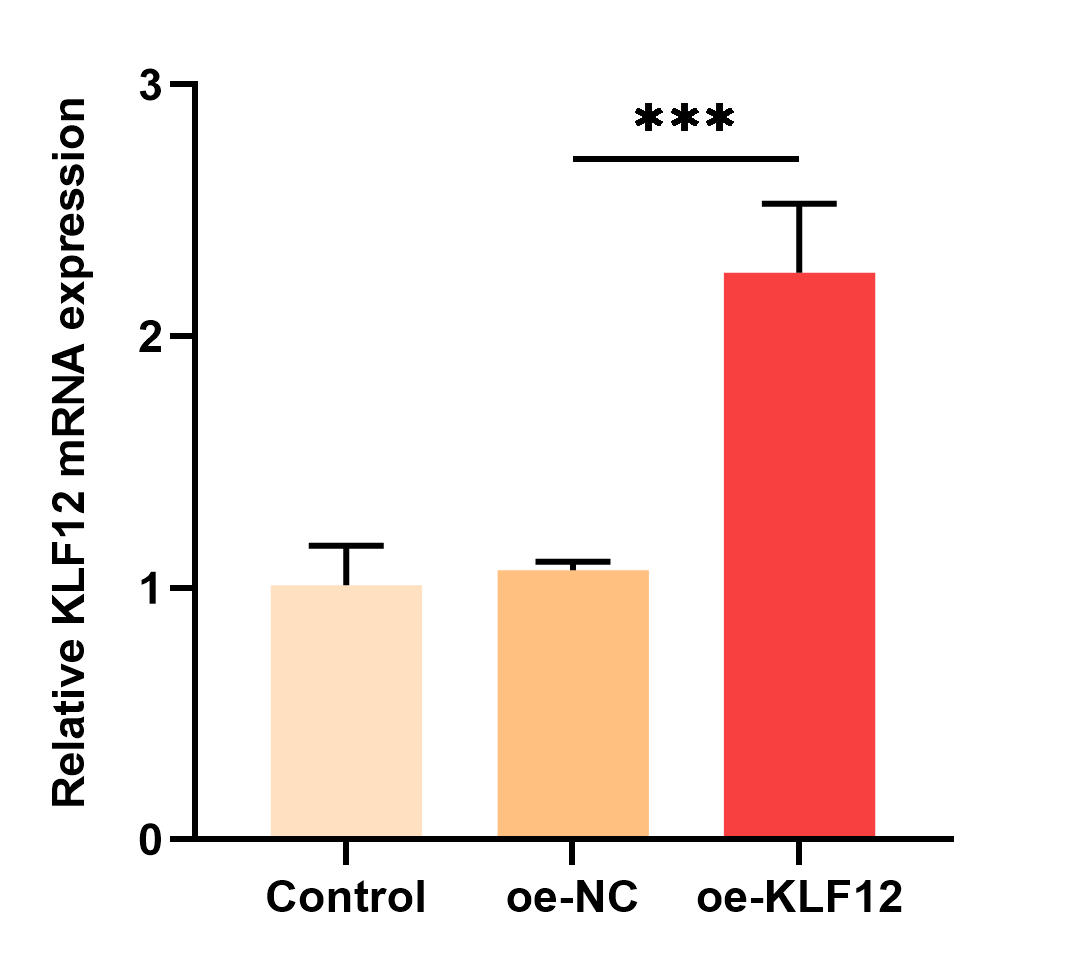

Supplement: Supplementary file 1 [file 491749-supplementary-figure.docx]
